# Supplementary material for: Interaction between p53 and Ras signaling controls cisplatin resistance via HDAC4- and HIF-1α-mediated regulation of apoptosis and autophagy
Source: PubMed Central journal article supplement — Theranostics. 2019 Jan 30;9(4):1096–114. doi: 10.7150/thno.29673 (PMC6401400; doi:10.7150/thno.29673), 2019-01-30
Supplement: thnov09p1096s1.pdf [file thnov09p1096s1.pdf]

## Supplementary figure legends

### **SFigure 1. Examination of cellular signaling and proliferation and enlarged tumor tissues**

**A-B.** Detection of cellular signaling (A) and proliferation (B) in parental and empty vector-transfected SKOV3 cells by western blot. **C.** Detection of ERK1/2, AKT and autophagy-associated molecules in SKOV3<sup>T</sup>/V12 cells by western blot after silencing of ERK1/2 or AKT1/2 with specific siRNAs. **D.** Tumor tissues derived from animals subcutaneously inoculated with SKOV3<sup>T</sup>, SKOV3<sup>T</sup>/V12, SKOV3<sup>T</sup>/S35, SKOV3<sup>T</sup>/E38, or SKOV3<sup>T</sup>/C40 cells, followed by administration of placebo, DOX, cisplatin, or DOX+cisplatin. Protein markers are properly labeled as indicated in **A** and **C**.

### **SFigure 2. Cellular localization of HDAC4 and HIF-1 $\alpha$**

**A-B.** Selected images showing nuclear and cytoplasmic localization of HDAC4 and HIF-1 $\alpha$  regulated by p53 induction and RAS mutant transfection. Scale bars = 10  $\mu$ m.

### **SFigure 3. HDAC4/p-HDAC4 and HIF-1 $\alpha$ intracellular localization regulated by p53 and RAS status.**

**A-C.** Representative images showing cellular HDAC4 (**A**), p-HDAC4 (**B**) and HIF-1 $\alpha$  (**C**) localization in ovarian cancer cell lines. **D.** Images showing HDAC4 (red) and HIF-1 $\alpha$  (green) co-localization (yellow) in ovarian cancer cells HEY (KRAS mutation), SKOV3 (p53 loss) and A2780 (both p53 and RAS wild type). **E-G.** Selected images show cellular HDAC4 (**A**), p-HDAC4 (**B**) and HIF-1 $\alpha$  (**C**) localization in lung cancer cells. **H.** Images showing HDAC4 (green) and HIF-1 $\alpha$  (red) co-localization (yellow) in lung cancer cells A549 (RAS mutation), H1299 (p53 loss), H23 (both p53 and RAS mutations), and H358 (p53 loss and RAS mutation) cells. Scale bars = 20  $\mu$ m.

### **SFigure 4. Interaction of HDAC4 with HIF-1 $\alpha$ , Atg3 and Atg12**

**A-C.** Overexpression of HDAC4 increases HDAC4 nuclear accumulation (**A**) and protein phosphorylation in cytoplasm (**B**), and stimulates HIF-1 $\alpha$  nuclear accumulation (**C**). **D.** Knockdown of HIF-1 $\alpha$  upregulates HDAC4 expression. **E.** No acetylation of ATG3 and ATG12 was detected by Co-IP/WB. **F.** Co-IP did not reveal a direct interaction between HDAC4 and Atg3 or Atg12 in SKOV3<sup>T</sup> or SKOV3<sup>T</sup>/V12 cells. **G.** No co-localization between HDAC4 and Atg3 (upper panel) or Atg12 (lower panel) detected in SKOV3<sup>T</sup>/V12 cells. Scale bars = 20  $\mu$ m. **H.** Relative mRNA levels of the transcription factor CREBZF in various cell lines derived from the data of the Gene Expression arrays. Protein markers are properly labeled as indicated in **E** and **F**.

**SFigure 5. HDAC4 and HIF-1 $\alpha$  promote cisplatin resistance.**

**A.** IC<sub>50</sub> values of cisplatin in cells responding to HDAC4 and HIF-1 $\alpha$  overexpression or silencing without p53 induction (DOX-). **B.** IC<sub>50</sub> values of cisplatin in cells responding to HDAC4 or HIF-1 $\alpha$  overexpression or silencing with p53 induction (DOX+).

**SFigure 6. Tumor tissues (enlarged)**

Tumors derived from animals injected with cells overexpressing cDNA and shRNA of HDAC4 (**A**) or HIF-1 $\alpha$  (**B**), followed by p53 induction and cisplatin treatment.

**SFigure 7. High ERK mRNA expression indicates a poor prognosis in serous ovarian cancer patients.**

**A-C.** Kaplan–Meier survival analyses were conducted to evaluate the effect of ERK on overall survival (**A**) in the presence of mutant p53 (**B**) and wild-type p53 (**C**). **D-F.** Kaplan–Meier survival analyses were conducted to evaluate the effect of ERK on progression-free survival (**D**) in the presence of mutant p53 (**E**) and wild-type p53 (**F**). **G-H.** Kaplan–Meier survival analyses to evaluate the effect of AKT on progression-free survival (**G**) in the presence of mutant p53.

Supplementary figure 1

**A**

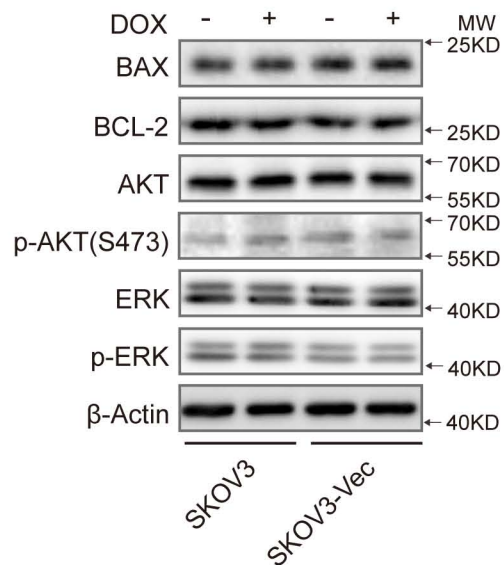

**B**

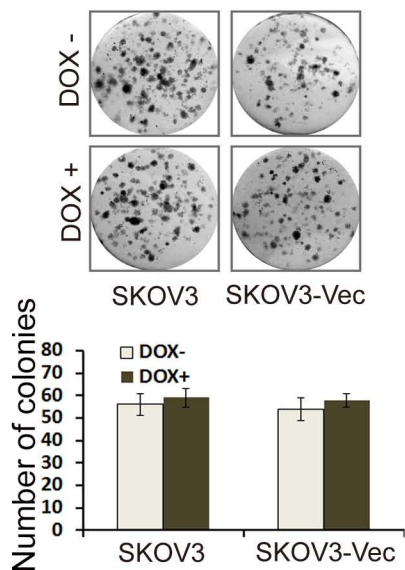

**C**

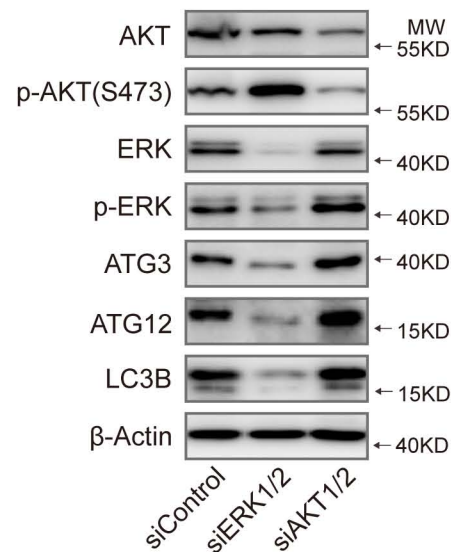

**D**

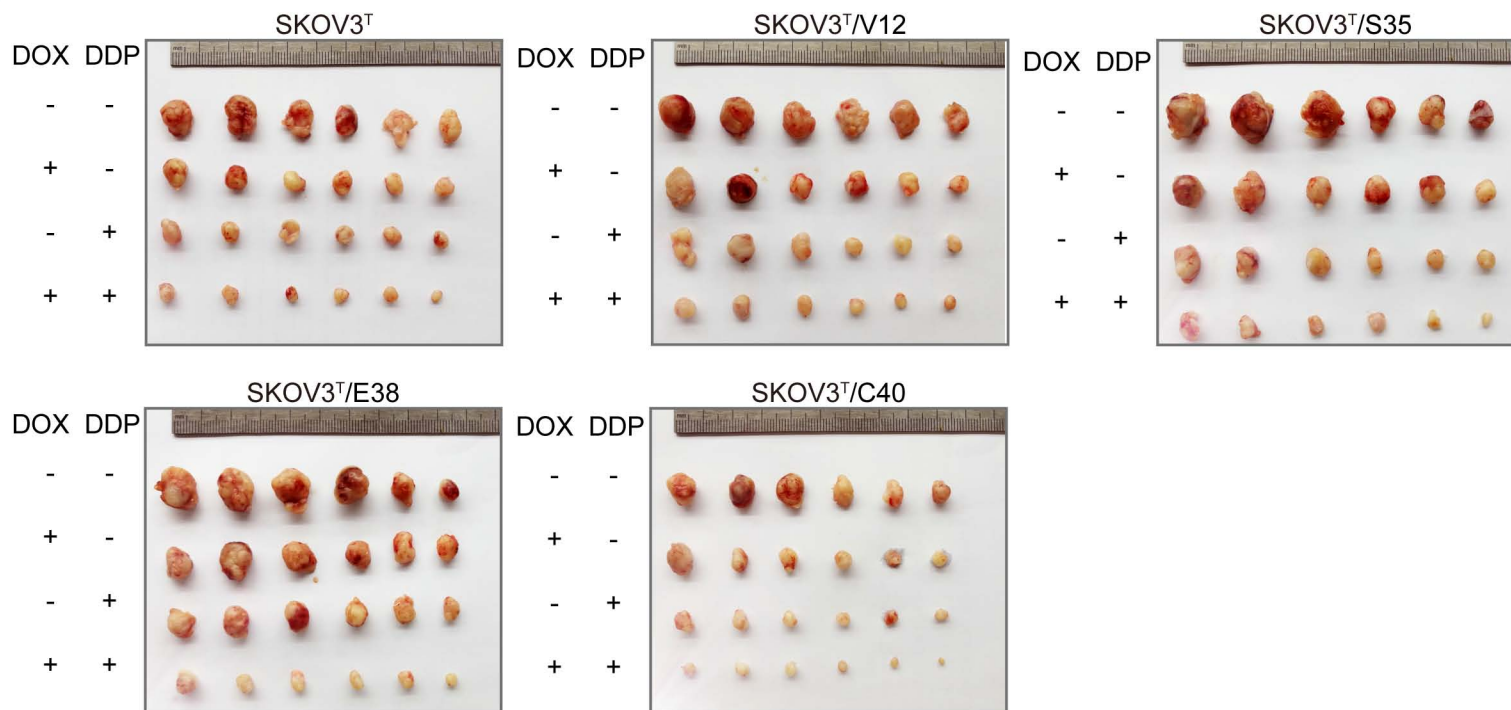

Supplementary figure 2

**A**

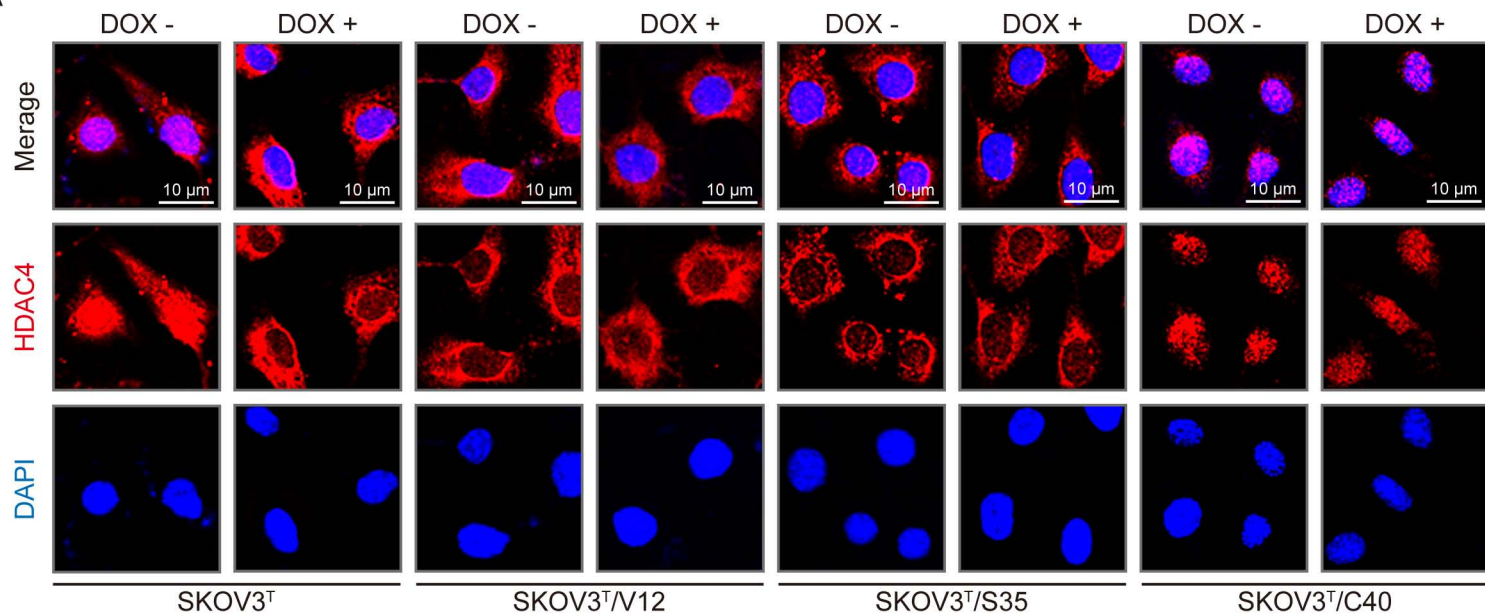

**B**

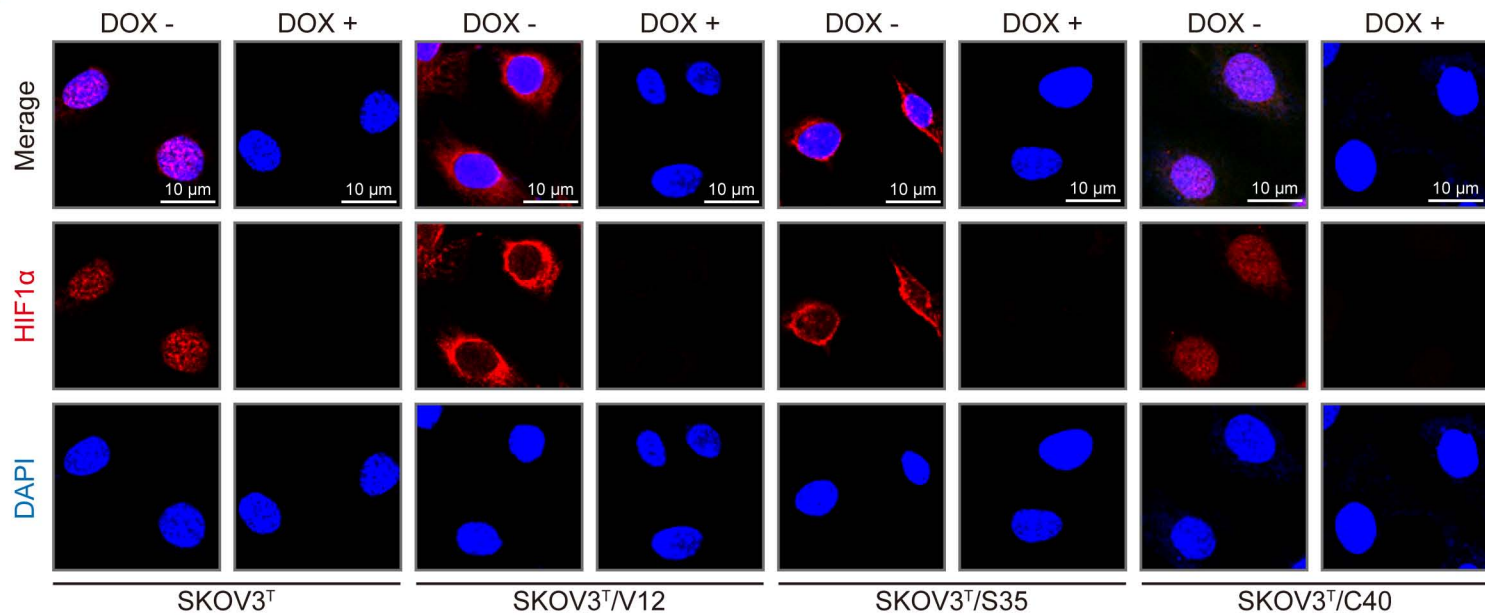

Supplementary figure 3

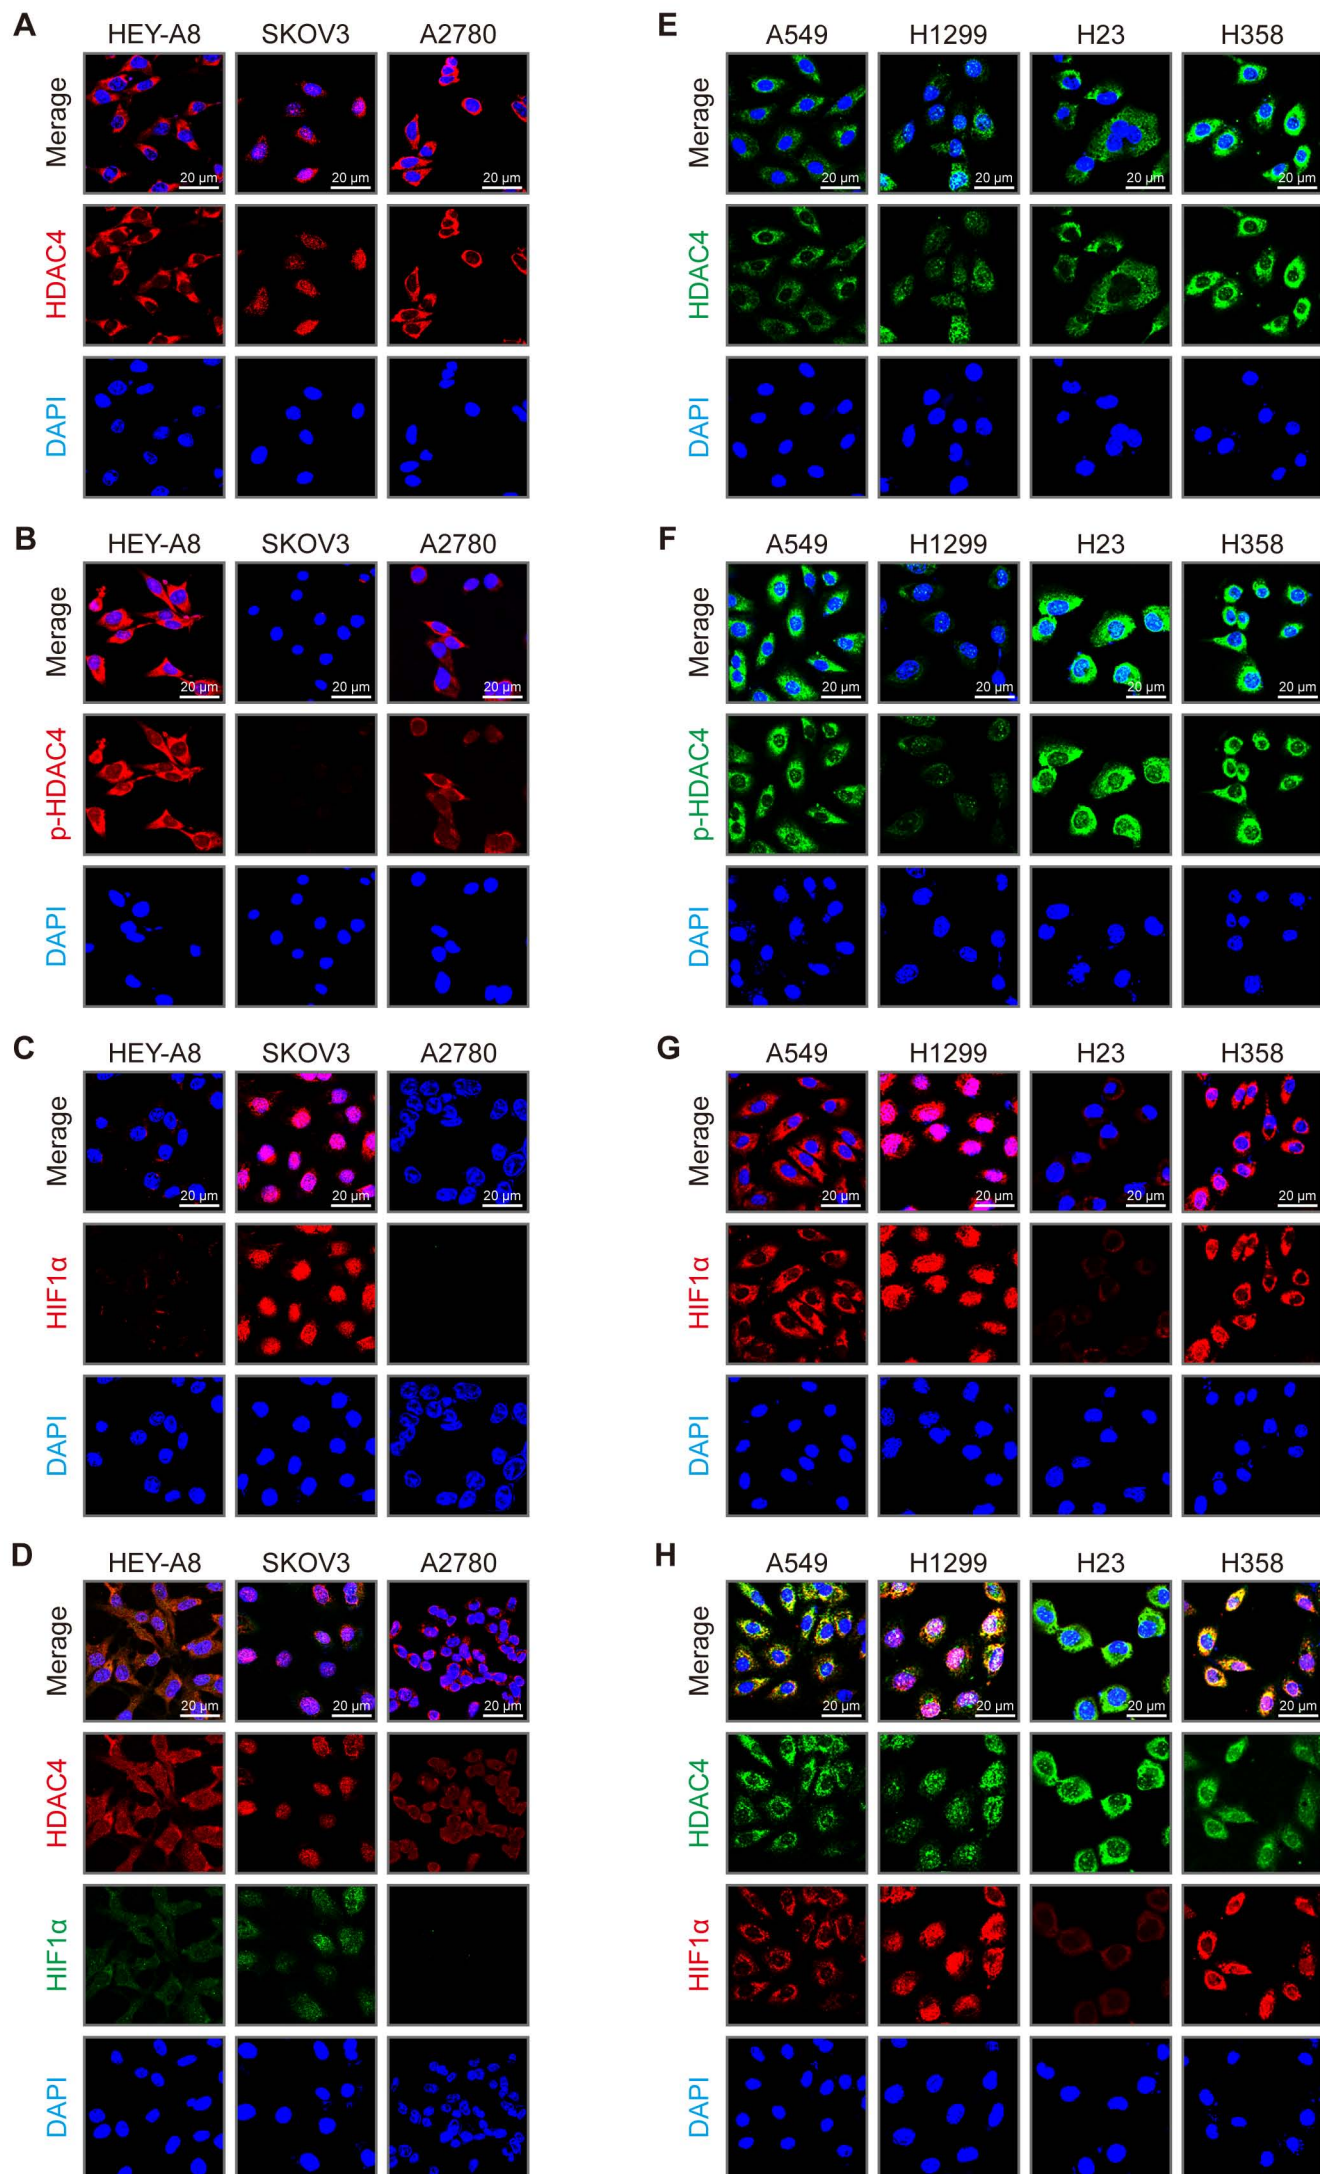

Supplementary figure 4

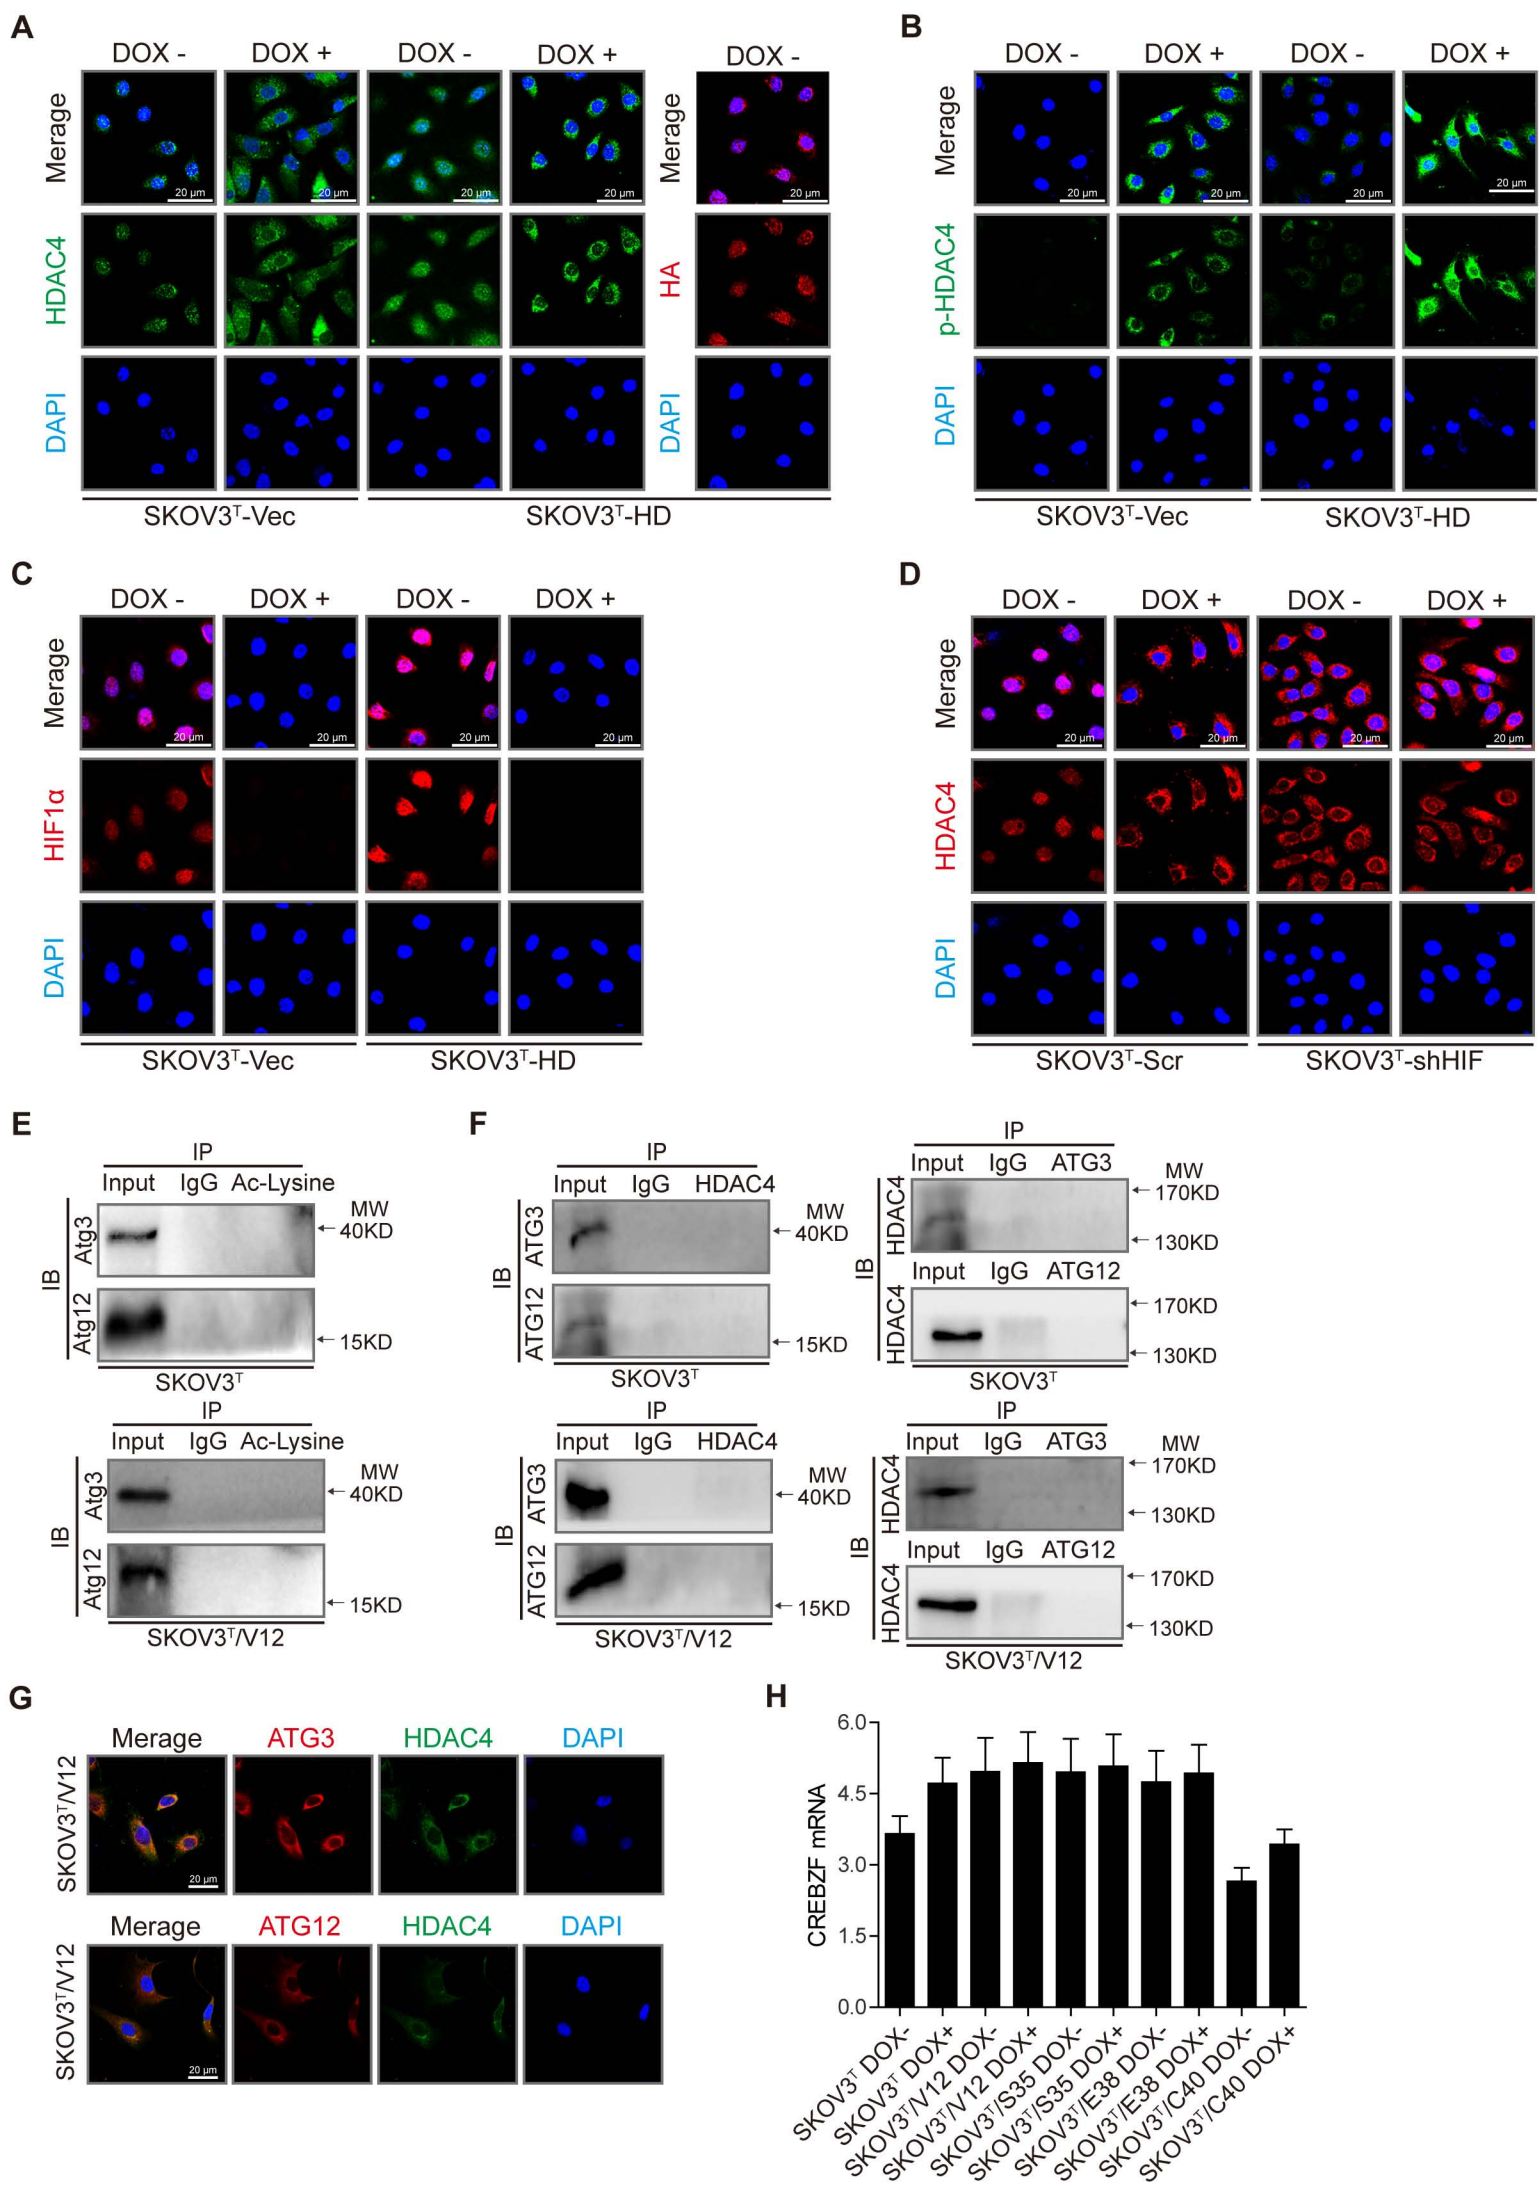

A

DOX -

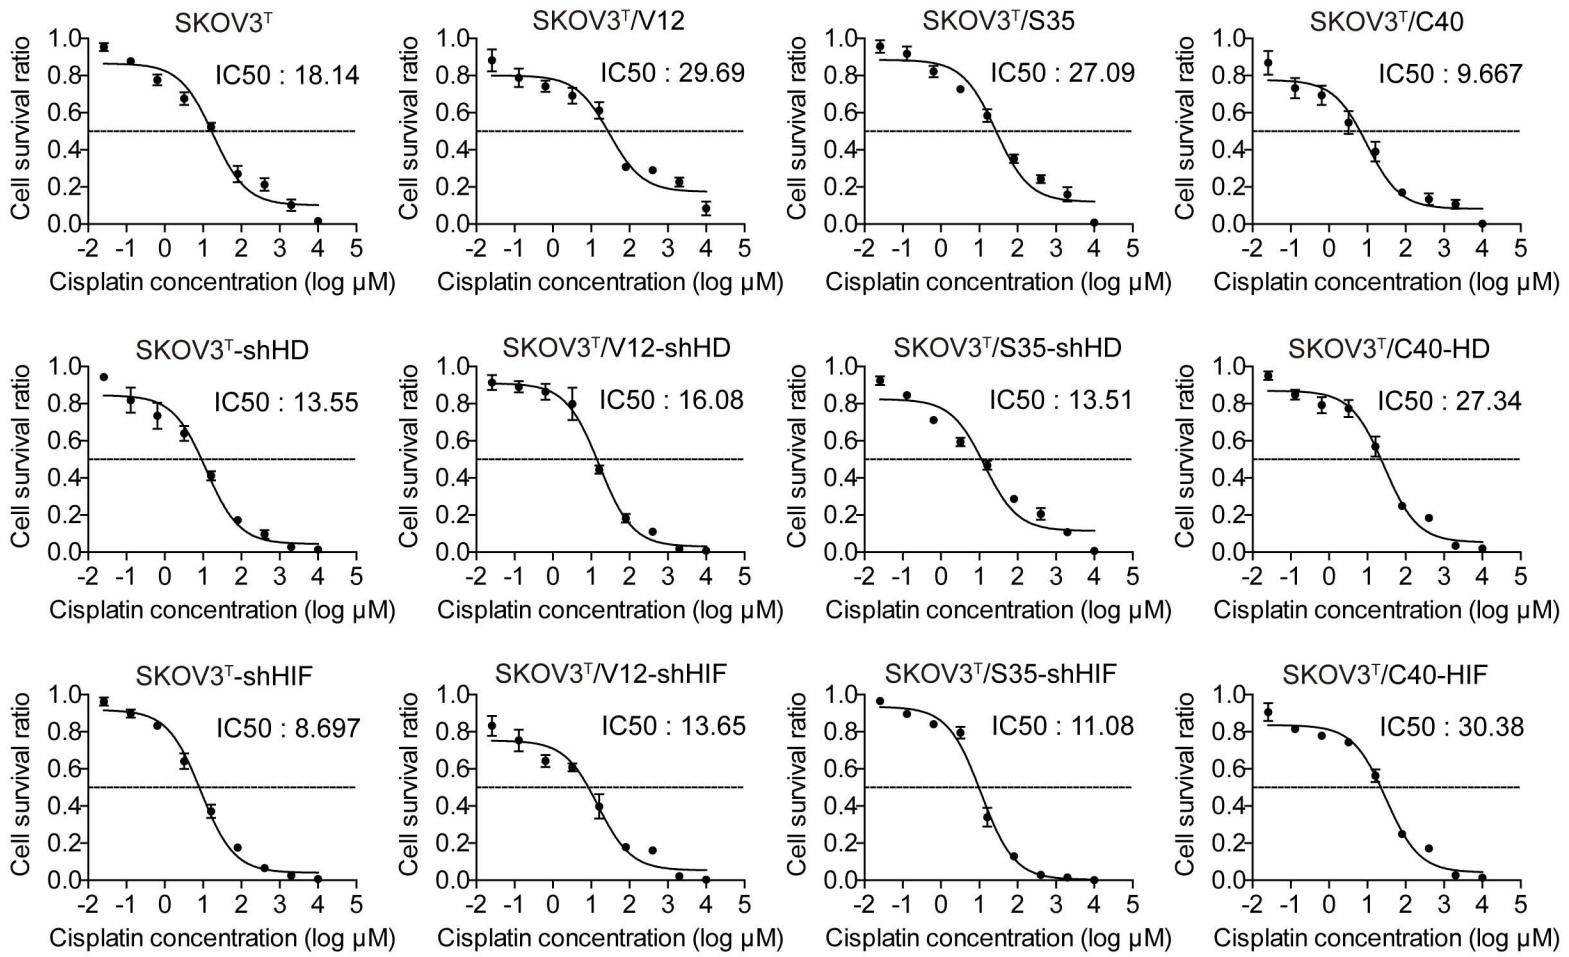

B

DOX +

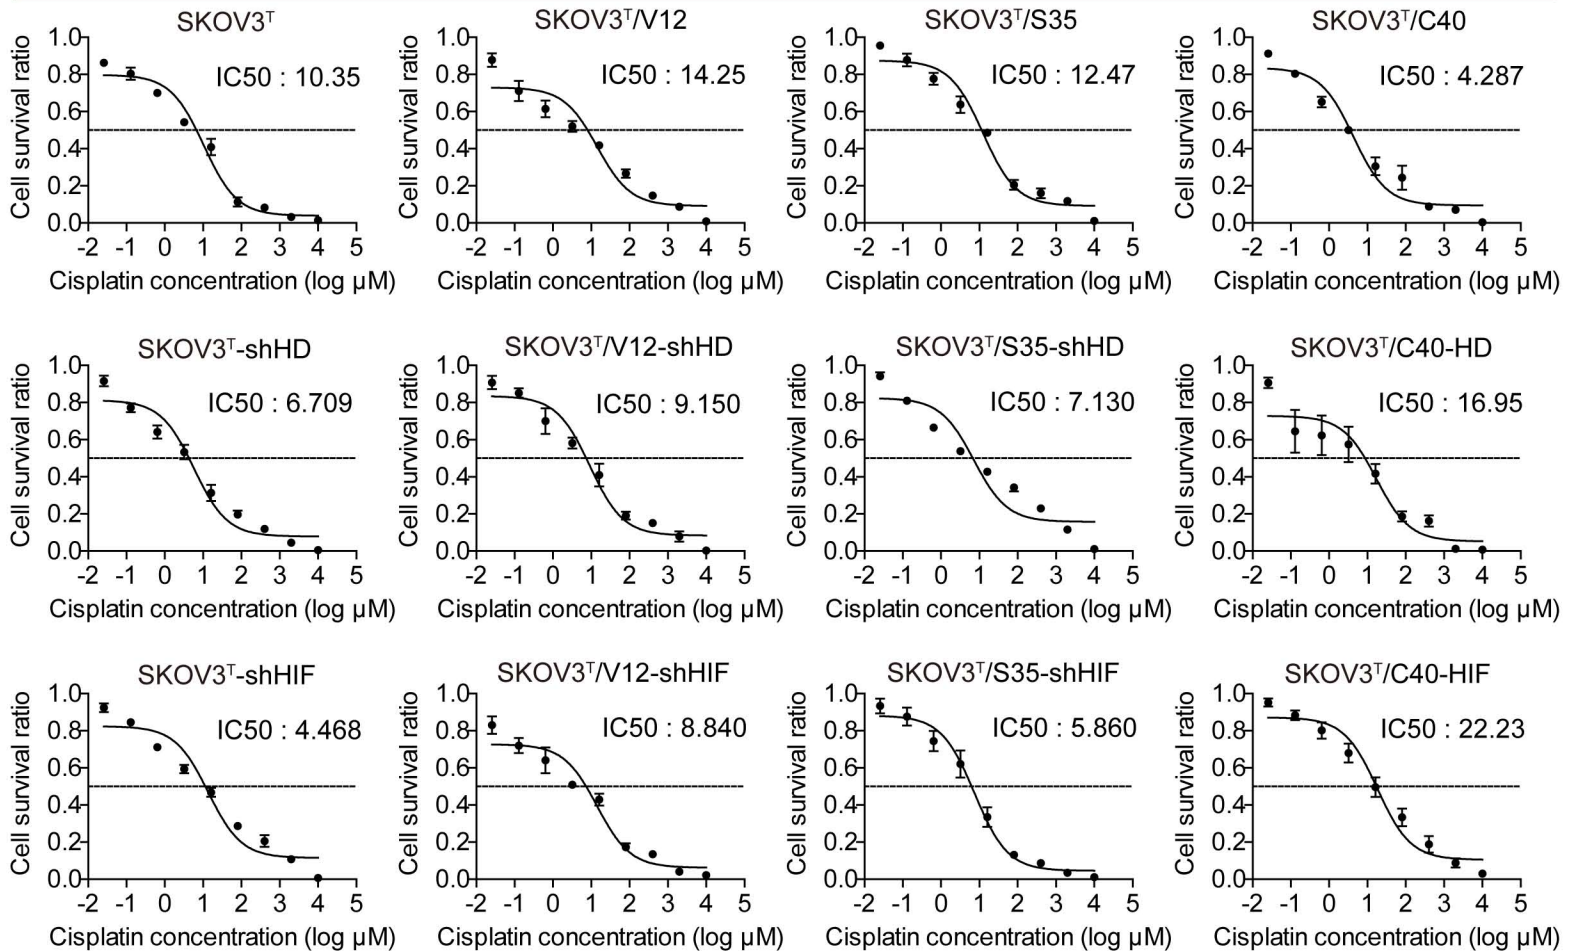

**A**

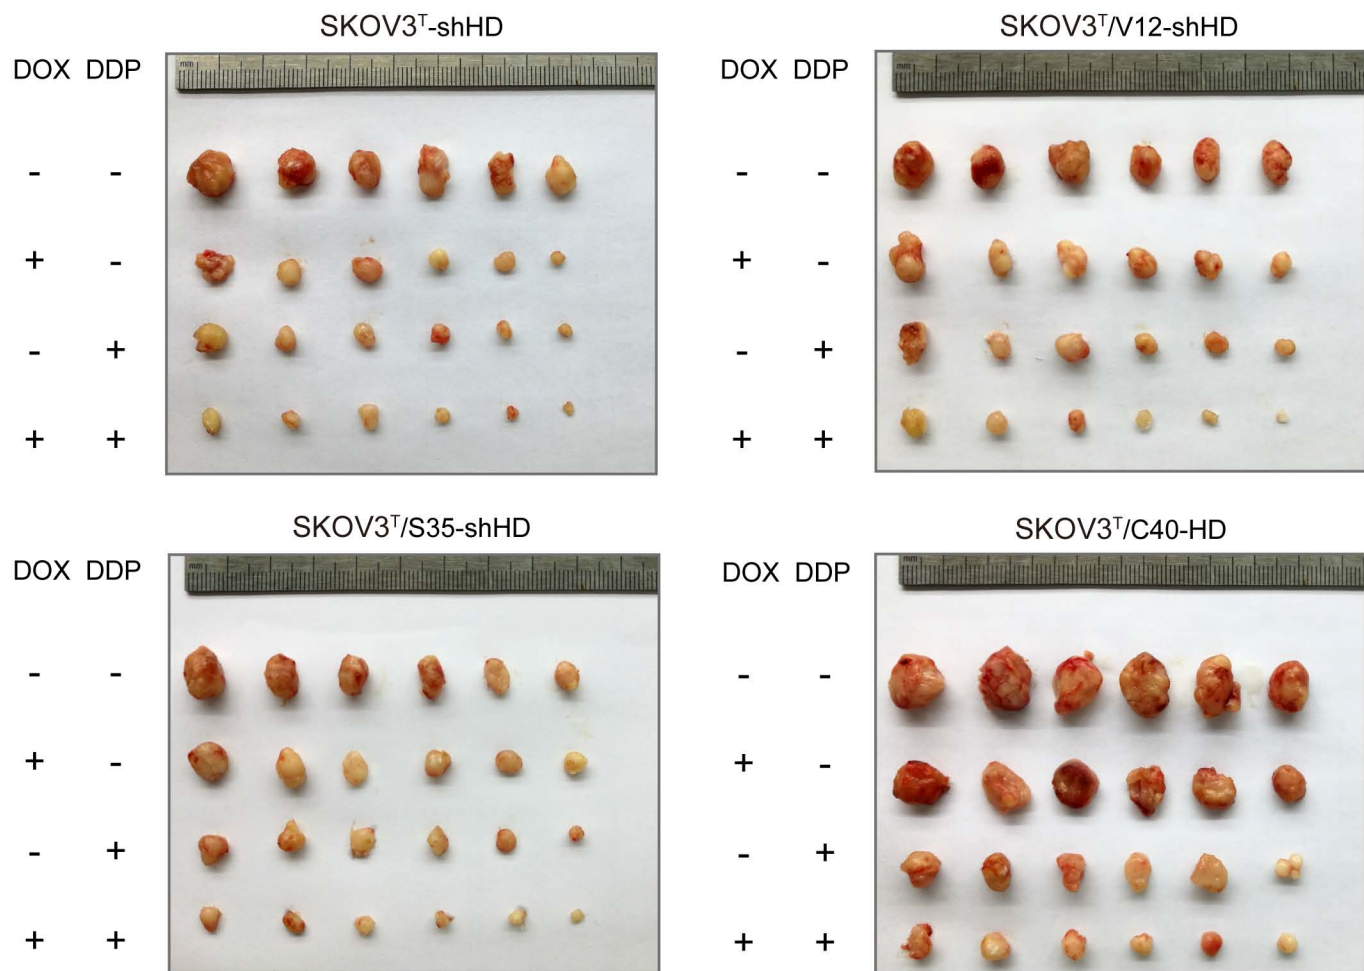

**B**

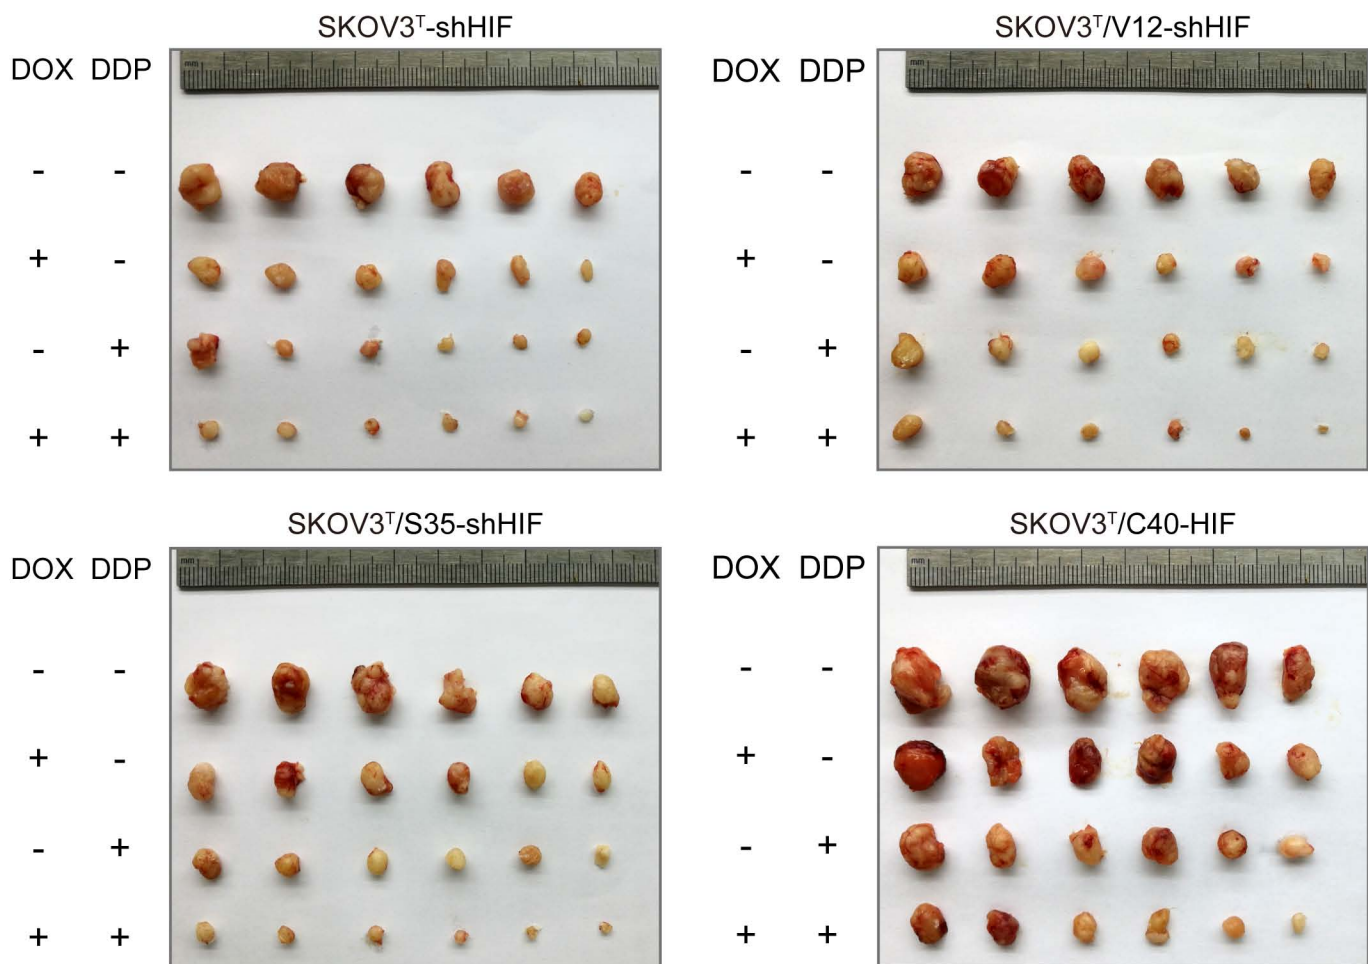



# Supplementary figure 7

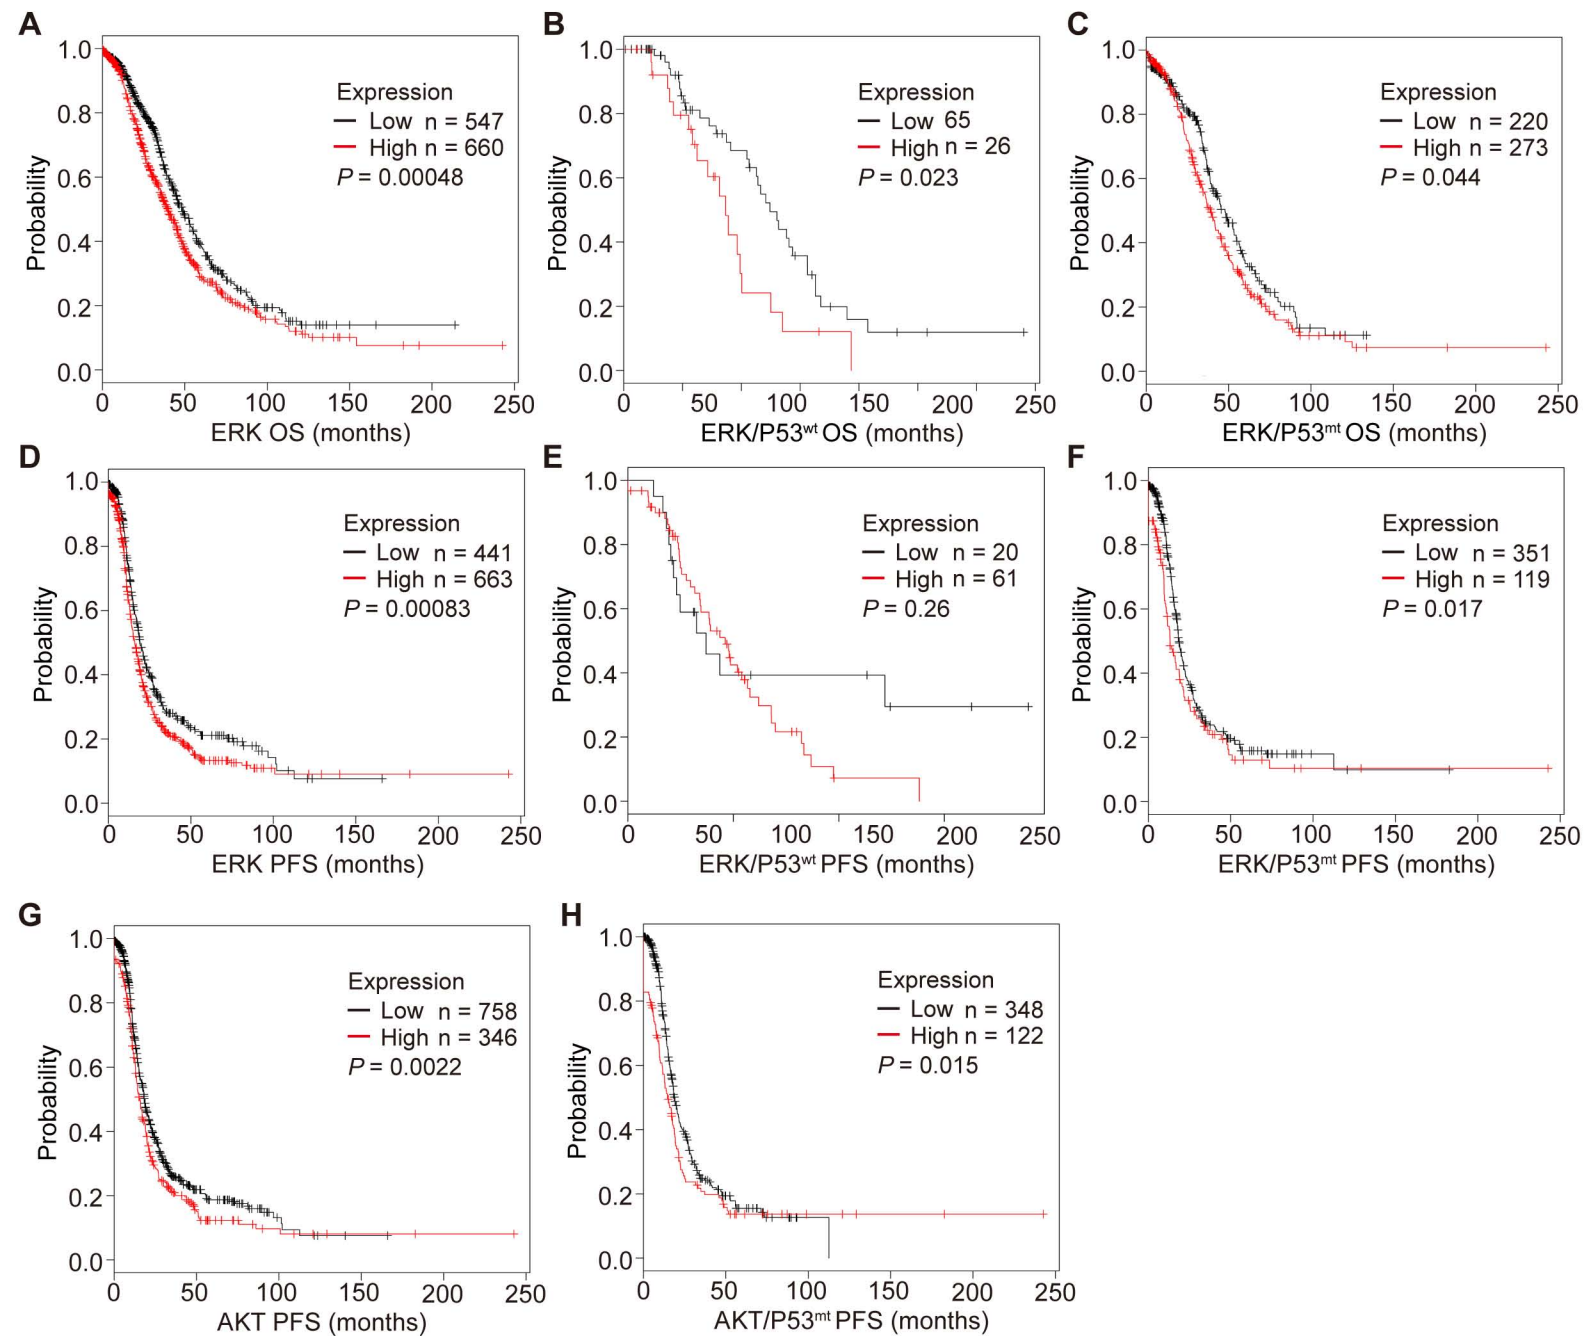

**Supplementary table 1. Information of the primary antibodies used in the study**

| Antibody          | Catalog Number | Company             | Dilution | Purpose |
|-------------------|----------------|---------------------|----------|---------|
| HA-Tag            | cs-3724        | Cell Signaling Inc. | 1:3000   | WB      |
| HIS-Tag           | cs-2365        | Cell Signaling Inc. | 1:3000   | WB      |
| E2F1              | cs-3742        | Cell Signaling Inc. | 1:1000   | WB      |
| ERK1/2            | cs-9102        | Cell Signaling Inc. | 1:1000   | WB      |
| p-ERK1/2          | cs-9101        | Cell Signaling Inc. | 1:1000   | WB      |
| AKT               | cs-9272        | Cell Signaling Inc. | 1:1000   | WB      |
| p-AKT(S473)       | cs-9018        | Cell Signaling Inc. | 1:1000   | WB      |
| Bax               | cs-5023        | Cell Signaling Inc. | 1:1000   | WB      |
| Bcl-2             | cs-15071       | Cell Signaling Inc. | 1:1000   | WB      |
| Beclin-1          | cs-3459        | Cell Signaling Inc. | 1:1000   | WB      |
| Atg3              | cs-3415        | Cell Signaling Inc. | 1:1000   | WB      |
| Atg12             | cs-4180        | Cell Signaling Inc. | 1:1000   | WB      |
| Atg16             | cs-8089        | Cell Signaling Inc. | 1:1000   | WB      |
| HDAC4             | cs-15164       | Cell Signaling Inc. | 1:1000   | WB      |
| GAPDH             | cs-5174        | Cell Signaling Inc. | 1:5000   | WB      |
| P53               | sc-126         | Santa Cruz Biotech  | 1:1000   | WB      |
| P21               | sc-271532      | Santa Cruz Biotech  | 1:1000   | WB      |
| pan-RAS           | sc-166691      | Santa Cruz Biotech  | 1:1000   | WB      |
| SQSTM1(p62)       | sc-28359       | Santa Cruz Biotech  | 1:1000   | WB      |
| AC-Histone H3     | sc-56616       | Santa Cruz Biotech  | 1:1000   | WB      |
| LC3B              | L7543          | Sigma Aldrich       | 1:1000   | WB      |
| $\beta$ -actin    | A2228          | Sigma Aldrich       | 1:5000   | WB      |
| p-HDAC4(S632)     | ab39408        | Abcam               | 1:1000   | WB      |
| HIF-1 $\alpha$    | ab51608        | Abcam               | 1:1000   | WB      |
| $\alpha$ -tubulin | 11224-1-AP     | Proteintech         | 1:5000   | WB      |
| CREBZF            | 19017-1-AP     | Proteintech         | 1:1000   | WB      |
| Histone 3         | 17168-1-AP     | Proteintech         | 1:3000   | WB      |
| LC3B              | L7543          | Sigma Aldrich       | 1:250    | IF      |
| HIF-1 $\alpha$    | sc-13515       | Santa Cruz Biotech  | 1:200    | IF      |
| Atg3              | sc-393660      | Santa Cruz Biotech  | 1:200    | IF      |
| Atg12             | sc-271668      | Santa Cruz Biotech  | 1:200    | IF      |
| $\beta$ -actin    | sc-1616        | Santa Cruz Biotech  | 1:500    | IF      |
| $\alpha$ -tubulin | 11224-1-AP     | Proteintech         | 1:500    | IF      |
| HDAC4             | ab12172        | Abcam               | 1:200    | IF      |
| p-HDAC4(S632)     | ab39408        | Abcam               | 1:200    | IF      |
| HDAC4             | cs-15164       | Cell Signaling Inc. | 1:100    | CO-IP   |
| Ac-Lysine         | cs-9681        | Cell Signaling Inc. | 1:100    | CO-IP   |
| HIF-1 $\alpha$    | ab51608        | Abcam               | 1:100    | CO-IP   |

**Supplementary Table 2. Putative CREBZF binding sites analyzed in promoter regions of Atg3 and Atg12 genes.**

| Name   | Sequence ID | Start | End   | Predicted sequence |
|--------|-------------|-------|-------|--------------------|
| CREBZF | Atg3        | -1770 | -1762 | <i>TGACTCAC</i>    |
| CREBZF | Atg3        | -1046 | -1038 | <i>TGGCTCAC</i>    |
| CREBZF | Atg12       | -1106 | -1098 | <i>ATTCTTCAT</i>   |

**Supplementary Table 3. Association of HDAC4, HIF-1 $\alpha$ , CREBZF, ERK, AKT, and p53 mRNA expression with the prognosis of serous ovarian cancer patients.**

| GENES          | PROBES  | OS ( <i>P</i> ) |            |        | PFS ( <i>P</i> ) |            |        |
|----------------|---------|-----------------|------------|--------|------------------|------------|--------|
|                |         | All             | mt p53     | wt p53 | All              | mt p53     | wt p53 |
| HDAC4          | 204225  | 0.037*          | 0.092      | -      | 0.45             | 0.36       | -      |
|                | 228813  | 0.0037**        | 0.27       | -      | 0.000094***      | 0.011*     | -      |
|                | 1554322 | 0.054           | 0.1        | -      | 0.019*           | 0.072      | -      |
| HIF-1 $\alpha$ | 200989  | 0.068           | 0.015*     | 0.018* | 0.018*           | 0.083      | 0.42   |
| CREBZF         | 202977  | 0.23            | 0.081      | -      | 0.099            | 0.24       | -      |
|                | 202978  | 0.029*          | 0.052      | -      | 0.033*           | 0.0088**   | -      |
|                | 202979  | 0.038*          | 0.19       | -      | 0.026*           | 0.15       | -      |
|                | 213584  | 0.00046***      | 0.21       | -      | 0.029*           | 0.018*     | -      |
|                | 225594  | 0.039*          | 0.051      | -      | 0.52             | 0.0039**   | -      |
|                | 225595  | 0.25            | 0.13       | -      | 0.0057**         | 0.12       | -      |
| ERK            | 208351  | 0.11            | 0.23       | 0.31   | 0.0034**         | 0.04*      | 0.16   |
|                | 209588  | 0.00048***      | 0.044*     | 0.023* | 0.00083***       | 0.017*     | 0.26   |
|                | 209589  | 0.0027**        | 0.00057*** | 0.15   | 1.7e-05***       | 0.00094*** | 0.24   |
|                | 210651  | 0.023*          | 0.031*     | 0.42   | 1.2e-06***       | 0.0013**   | 0.26   |
|                | 211165  | 0.00025***      | 0.19       | 0.073  | 0.26             | 0.082      | 0.25   |
|                | 212271  | 0.17            | 0.1        | 0.1    | 0.061            | 0.12       | 0.21   |
| AKT            | 207163  | 0.055           | 0.27       | 0.22   | 0.0022**         | 0.015*     | 0.14   |
| p53            | 201746  | -               | 0.061      | 0.31   | -                | 0.011*     | 0.061  |
|                | 211300  | -               | 0.047*     | 0.25   | -                | 0.015*     | 0.015  |

Kaplan–Meier survival analyses were conducted to evaluate the effect of HDAC4, HIF-1 $\alpha$ , CREBZF, ERK, and AKT mRNA on the overall and progression-free survival probability in the presence of mutant and wide-type p53 expression. A red number suggests good or poor prognosis with high gene expression, respectively; \* refers to  $P < 0.05$ ; \*\* refers to  $P < 0.01$ ; \*\*\* refers to  $P < 0.001$ .
